# Supplementary material
Source: PubMed Central journal article supplement (PMC556400)
Supplement: 7600596s1.pdf [file 7600596s1.pdf]

## Supplementary Figure S1

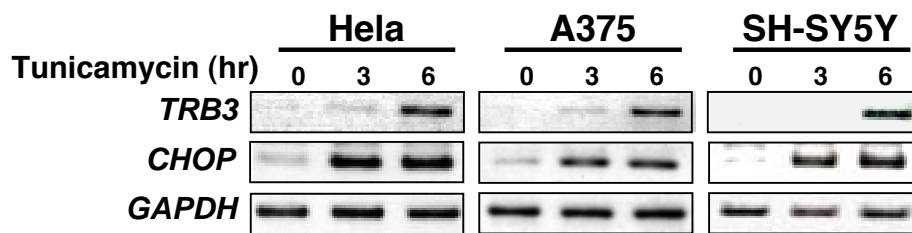

### Induction of *CHOP* and *TRB3* mRNA by Tunicamycin treatment in various cells.

Hela cells, A375 cells or SH-SY5Y cells were treated with 2 $\mu$ g/ml of Tunicamycin for indicated periods. Each mRNA level in the cells was analyzed by RT-PCR using specific primers. *TRB3*; 32 cycles, *CHOP*; 30 cycles, *GAPDH*; 24 cycles.
