# Supplementary material
Source: PubMed Central journal article supplement (PMC556400)
Supplement: 7600596s2.pdf [file 7600596s2.pdf]

## Supplementary Figure S2

**A**

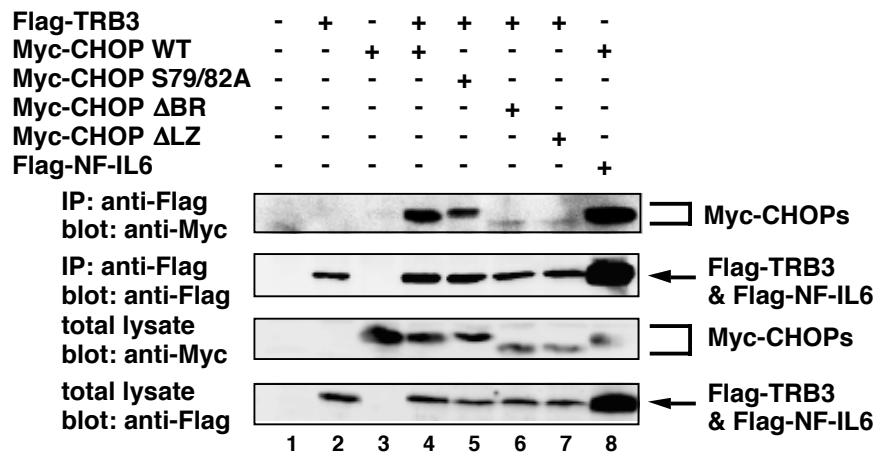

**B**

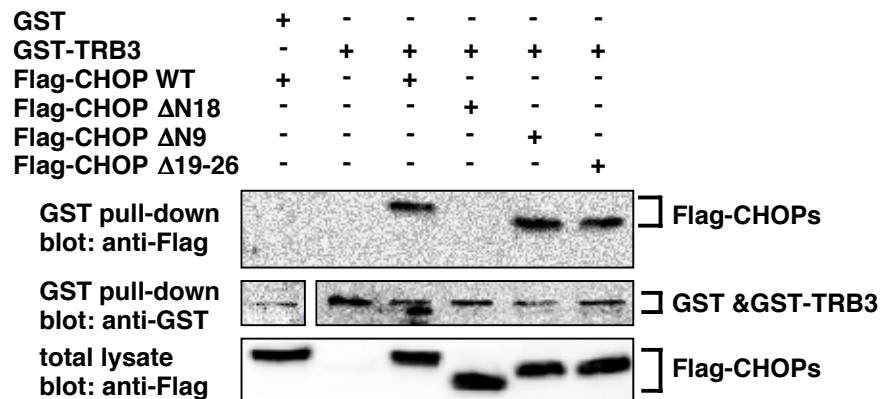

### TRB3 interacts with CHOP *in vivo*.

(A,B) 293 cells were transiently transfected with the indicated constructs. After 36hr, cells were treated with 10 $\mu$ M MG132 for 12hr. The cell lysates were immunoprecipitated with anti-Flag antibody (A) or pull-downed with glutathione-Sepharose (B) and immunoblotted with anti-Myc or anti-Flag antibodies. The expression level of each protein was assessed by the immunoblotting of cell lysates with anti-Flag, anti-Myc or anti-GST antibodies.
