# Supplementary material
Source: PubMed Central journal article supplement (PMC556400)
Supplement: 7600596s4.pdf [file 7600596s4.pdf]

## Supplementary Figure S4

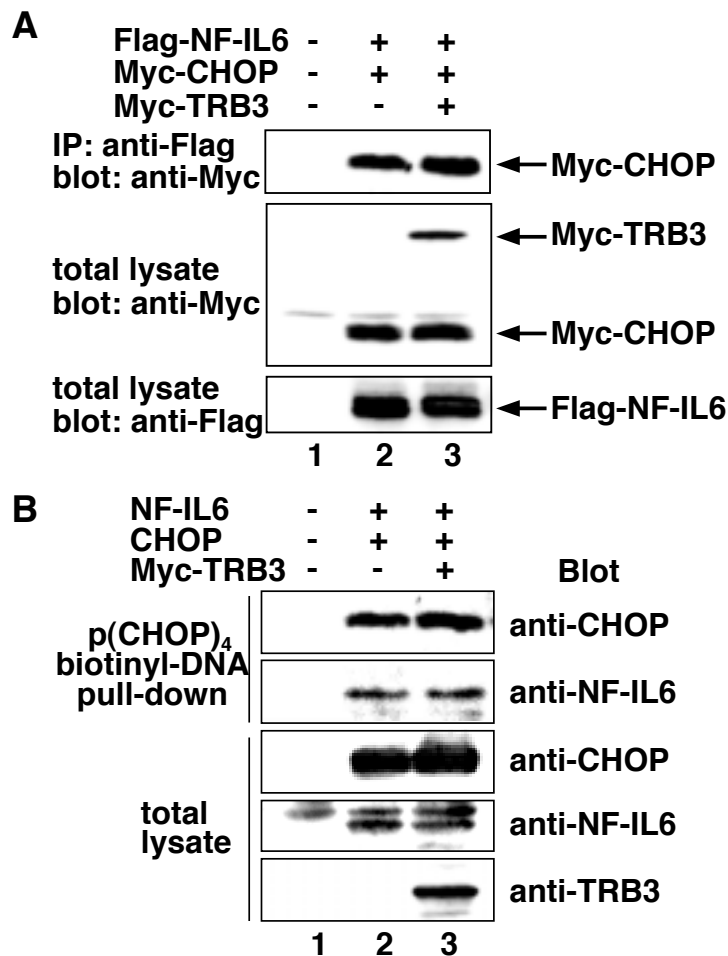

### TRB3 did not interfere with the dimerization of CHOP with NF-IL6 nor DNA binding of CHOP.

(A) 293 cells were transiently transfected with the indicated constructs. After 48hr, the cell lysates were immunoprecipitated with anti-Flag antibody and immunoblotted with anti-Myc antibody. The expression level of each protein was assessed by the immunoblotting of cell lysates with anti-Flag or anti-Myc antibodies.

(B) 293 cells were transiently transfected with the indicated constructs. After 48hr, the cells were lysed and their extracts were subjected to a pull-down assay with immobilized p(CHOP)<sub>4</sub> DNA templates. Proteins associated with p(CHOP)<sub>4</sub> DNA were purified with magnetic beads and analyzed by immunoblotting with anti-CHOP and anti NF-IL6 antibodies. The expression level of each protein was assessed by the immunoblotting of cell lysates with anti-CHOP or anti-NF-IL6 antibodies.
