# Supplementary material
Source: PubMed Central journal article supplement (PMC556400)
Supplement: 7600596s5.pdf [file 7600596s5.pdf]

## Supplementary Figure S5

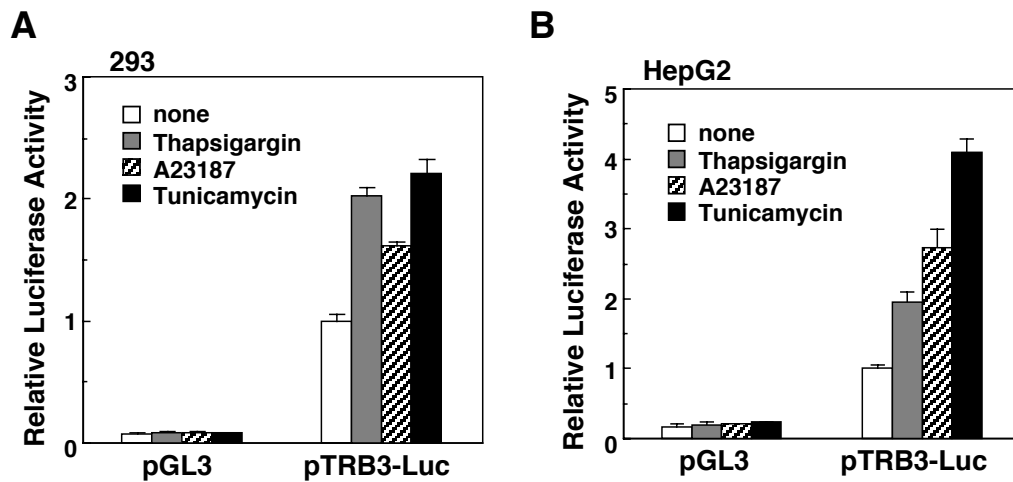

### ***TRB3* promoter is activated by various ER stressors.**

293 cells (A) or HepG2 cells (B) were transiently transfected with pTRB3-Luc and pCMV- $\beta$ -gal. After 24 hr, cells were treated with 2 $\mu$ M of Thapsigargin, 2 $\mu$ M of A23187 or 2 $\mu$ g/ml of Tunicamycin for 14hr. The luciferase activity in cell lysates was measured and normalized with  $\beta$ -galactosidase activity.
