# Supplementary material
Source: PubMed Central journal article supplement (PMC556400)
Supplement: 7600596s6.pdf [file 7600596s6.pdf]

## Supplementary Figure S6

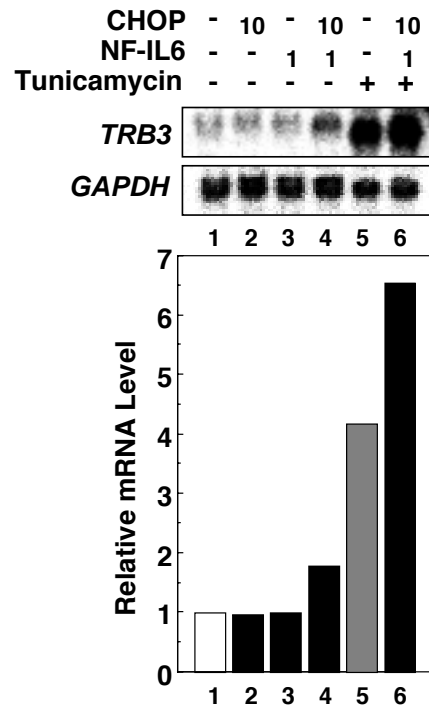

**Over-expression of CHOP and NF-IL6 promotes the induction of *TRB3* mRNA.** 293 cells were transiently transfected with the indicated constructs. After 48hr, cells were left untreated or treated with 2 $\mu$ g/ml of tunicamycin for 6hr. Total RNA was prepared and analyzed by Northern blotting using human *TRB3* and *GAPDH* cDNA as probes.
