# Supplementary material
Source: PubMed Central journal article supplement (PMC556400)
Supplement: 7600596s7.pdf [file 7600596s7.pdf]

## Supplementary Figure S7

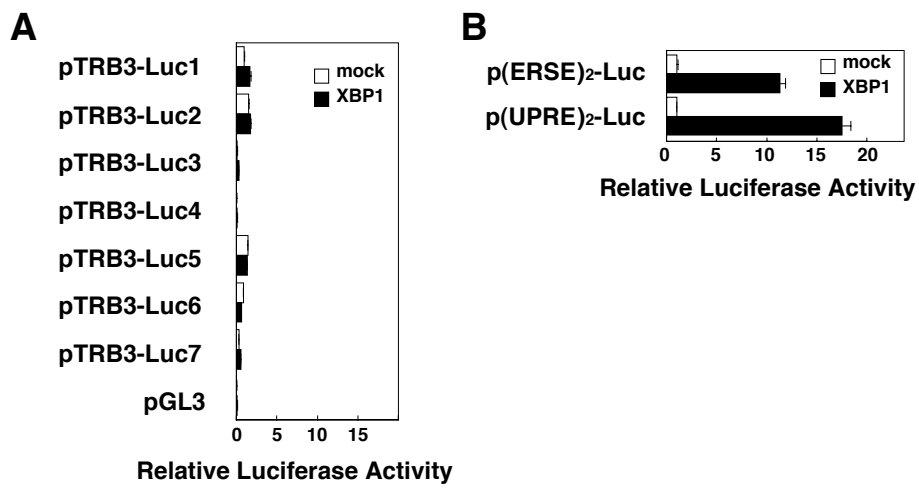

### **XBP1 does not activate the *TRB3* promoter.**

293 cells were transiently transfected with pTRB3-Lucs (A), p(ERSE)<sub>2</sub>-Luc or p(UPRE)<sub>2</sub>-Luc (B), with pCMV- $\beta$ -gal and the expression vector for XBP1. After 48hr, the luciferase activity in cell lysates was measured and was normalized with  $\beta$ -galactosidase activity.
