# Supplementary material
Source: PubMed Central journal article supplement (PMC556400)
Supplement: 7600596s8.pdf [file 7600596s8.pdf]

## Supplementary Figure S8

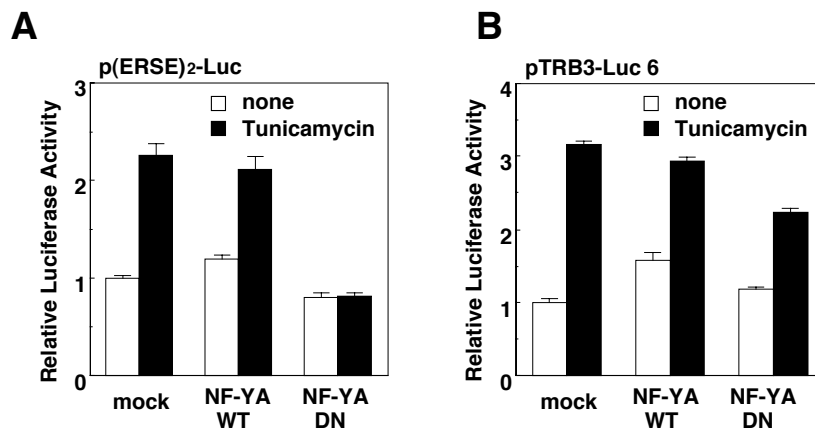

### **NF-Y does not participate in the Tunicamycin activated *TRB3* promoter.**

293 cells were transiently transfected with p(ERSE)2-Luc (A), or pTRB3-Luc6 (B), with pCMV- $\beta$ -gal and the expression vectors for wild type (WT) or dominant negative (DN) form of NF-YA. After 48hr, cells were treated with 2 $\mu$ g/ml of tunicamycin for 16 hr. The luciferase activity in cell lysates was measured and normalized with  $\beta$ -galactosidase activity.
